# Supplementary material
Source: PubMed Central journal article supplement (PMC5369386)
Supplement: Supp_Data.pdf [file Supp_Data.pdf]

# What Do You Want from the \_\_\_\_\_ Clinic/Program?

So that we can best meet you and your child's needs, the \_\_\_\_\_ Clinic/Program is doing a survey of what areas you would like help with so that your child can get healthier.

**Please rate how important it is for you to learn about each topic below. Please write in any other topics that are not listed.**

| <b>We are interested in help with Healthier Foods/Drinks:</b>                           |                          |                          |                          |                          |                          |
|-----------------------------------------------------------------------------------------|--------------------------|--------------------------|--------------------------|--------------------------|--------------------------|
|                                                                                         | Not at All               | A little Bit             | Somewhat                 | Quite a Bit              | Very Much                |
| <b>We want to know more about:</b>                                                      |                          |                          |                          |                          |                          |
| Finding affordable fruits/vegetables                                                    | <input type="checkbox"/> |
| Preparing fruits/vegetables                                                             | <input type="checkbox"/> |
| Shopping for healthy foods/drinks we can afford                                         | <input type="checkbox"/> |
| Making healthier meals at home                                                          | <input type="checkbox"/> |
| Preparing meals more quickly                                                            | <input type="checkbox"/> |
| Healthier recipes for cultural foods                                                    | <input type="checkbox"/> |
| Healthier choices when eating out                                                       | <input type="checkbox"/> |
| Eating healthier at school/work                                                         | <input type="checkbox"/> |
| Choosing healthier drinks                                                               | <input type="checkbox"/> |
| Other:                                                                                  | <input type="checkbox"/> |
| Other:                                                                                  | <input type="checkbox"/> |
| <b>Which one of the above topics is most important to you? Please circle one topic.</b> |                          |                          |                          |                          |                          |

|                                                                                         |                          |                          |                          |                          |                          |
|-----------------------------------------------------------------------------------------|--------------------------|--------------------------|--------------------------|--------------------------|--------------------------|
| <b>We want to know how to:</b>                                                          |                          |                          |                          |                          |                          |
| Eat more fruits/vegetables                                                              | <input type="checkbox"/> |
| Eat a healthier breakfast                                                               | <input type="checkbox"/> |
| Eat less junk food                                                                      | <input type="checkbox"/> |
| Eat smaller portions, have fewer second portions                                        | <input type="checkbox"/> |
| Eat together as a family                                                                | <input type="checkbox"/> |
| Drink healthier drinks                                                                  | <input type="checkbox"/> |
| Other:                                                                                  | <input type="checkbox"/> |
| Other:                                                                                  | <input type="checkbox"/> |
| <b>Which one of the above topics is most important to you? Please circle one topic.</b> |                          |                          |                          |                          |                          |

| <b>We are interested in help with Physical Activity/Exercise:</b>                       |                          |                          |                          |                          |                          |
|-----------------------------------------------------------------------------------------|--------------------------|--------------------------|--------------------------|--------------------------|--------------------------|
|                                                                                         | Not at All               | A little Bit             | Somewhat                 | Quite a Bit              | Very Much                |
| <b>We want to know more about:</b>                                                      |                          |                          |                          |                          |                          |
| Finding activities my child like to do                                                  | <input type="checkbox"/> |
| Comfortable activities for my child                                                     | <input type="checkbox"/> |
| <b>Which one of the above topics is most important to you? Please circle one topic.</b> |                          |                          |                          |                          |                          |

| <b>We want to know how to:</b>                                                          |                          |                          |                          |                          |                          |
|-----------------------------------------------------------------------------------------|--------------------------|--------------------------|--------------------------|--------------------------|--------------------------|
| Watch less TV                                                                           | <input type="checkbox"/> |
| Text less                                                                               | <input type="checkbox"/> |
| Play fewer video games                                                                  | <input type="checkbox"/> |
| Spend less time on the computer                                                         | <input type="checkbox"/> |
| Be more physically active                                                               | <input type="checkbox"/> |
| Other:                                                                                  | <input type="checkbox"/> |
| Other:                                                                                  | <input type="checkbox"/> |
| <b>Which one of the above topics is most important to you? Please circle one topic.</b> |                          |                          |                          |                          |                          |

| <b>We are interested in help with Family Support/Behavior:</b>                          |                          |                          |                          |                          |                          |
|-----------------------------------------------------------------------------------------|--------------------------|--------------------------|--------------------------|--------------------------|--------------------------|
|                                                                                         | Not at All               | A little Bit             | Somewhat                 | Quite a Bit              | Very Much                |
| <b>We want to know more about:</b>                                                      |                          |                          |                          |                          |                          |
| Helping my child handle teasing or bullying                                             | <input type="checkbox"/> |
| Helping my child make friends more easily                                               | <input type="checkbox"/> |
| Helping my child feel better about himself/herself                                      | <input type="checkbox"/> |
| <b>Which one of the above topics is most important to you? Please circle one topic.</b> |                          |                          |                          |                          |                          |

| <b>We want to know how to:</b>                                                          |                          |                          |                          |                          |                          |
|-----------------------------------------------------------------------------------------|--------------------------|--------------------------|--------------------------|--------------------------|--------------------------|
| Be more motivated to eat healthy                                                        | <input type="checkbox"/> |
| Be more motivated to be physically active                                               | <input type="checkbox"/> |
| Help my spouse/significant other get "on board" with healthy eating changes             | <input type="checkbox"/> |
| Help my spouse/significant other get "on board" with being more physically active       | <input type="checkbox"/> |
| Help other family members get "on board" with healthy eating changes                    | <input type="checkbox"/> |
| Help other family members get "on board" with being more physically active              | <input type="checkbox"/> |
| Other:                                                                                  | <input type="checkbox"/> |
| Other:                                                                                  | <input type="checkbox"/> |
| <b>Which one of the above topics is most important to you? Please circle one topic.</b> |                          |                          |                          |                          |                          |

| <b>We would think my child was doing well in the clinic/program if:</b>                 |                          |                          |                          |                          |                          |
|-----------------------------------------------------------------------------------------|--------------------------|--------------------------|--------------------------|--------------------------|--------------------------|
|                                                                                         | Not at All               | A little Bit             | Somewhat                 | Quite a Bit              | Very Much                |
| He/she lost a certain number of pounds (___ lbs)                                        | <input type="checkbox"/> |
| He/she had fewer medical problems due to weight                                         | <input type="checkbox"/> |
| He/she felt better about himself/herself                                                | <input type="checkbox"/> |
| We got healthier as a family                                                            | <input type="checkbox"/> |
| Our family had less conflict about eating healthy                                       | <input type="checkbox"/> |
| Our family had less conflict about being physically active                              | <input type="checkbox"/> |
| Other:                                                                                  | <input type="checkbox"/> |
| Other:                                                                                  | <input type="checkbox"/> |
| <b>Which one of the above topics is most important to you? Please circle one topic.</b> |                          |                          |                          |                          |                          |

How are you related to the patient? Please check all that apply.

- Biologic or birth mother
- Adoptive Mother
- Stepmother
- Foster Mother
- Grandmother
- Biologic or birth father
- Adoptive father
- Stepfather
- Grandfather
- Legal guardian
- Other (please describe \_\_\_\_\_)

|                                                                                                                                                                                                                                                                                                                                                                     |
|---------------------------------------------------------------------------------------------------------------------------------------------------------------------------------------------------------------------------------------------------------------------------------------------------------------------------------------------------------------------|
| Staff Use Only<br>Provider Code <input type="checkbox"/> MD <input type="checkbox"/> NP <input type="checkbox"/> RN <input type="checkbox"/> RD <input type="checkbox"/> PT <input type="checkbox"/> SW <input type="checkbox"/> Psych <input type="checkbox"/> Other (specify) _____<br>Language <input type="checkbox"/> English <input type="checkbox"/> Spanish |
|---------------------------------------------------------------------------------------------------------------------------------------------------------------------------------------------------------------------------------------------------------------------------------------------------------------------------------------------------------------------|
